# Supplementary material for: Feasibility of a 12-month-exercise intervention during and after radiation and chemotherapy in cancer patients: impact on quality of life, peak oxygen consumption, and body composition
Source: Springer Nature journal article supplement (doi:10.1186/s13014-016-0619-5), 2016-03-16
Supplement: MOESM1 [file 9774242]

**Supplementary Material:**

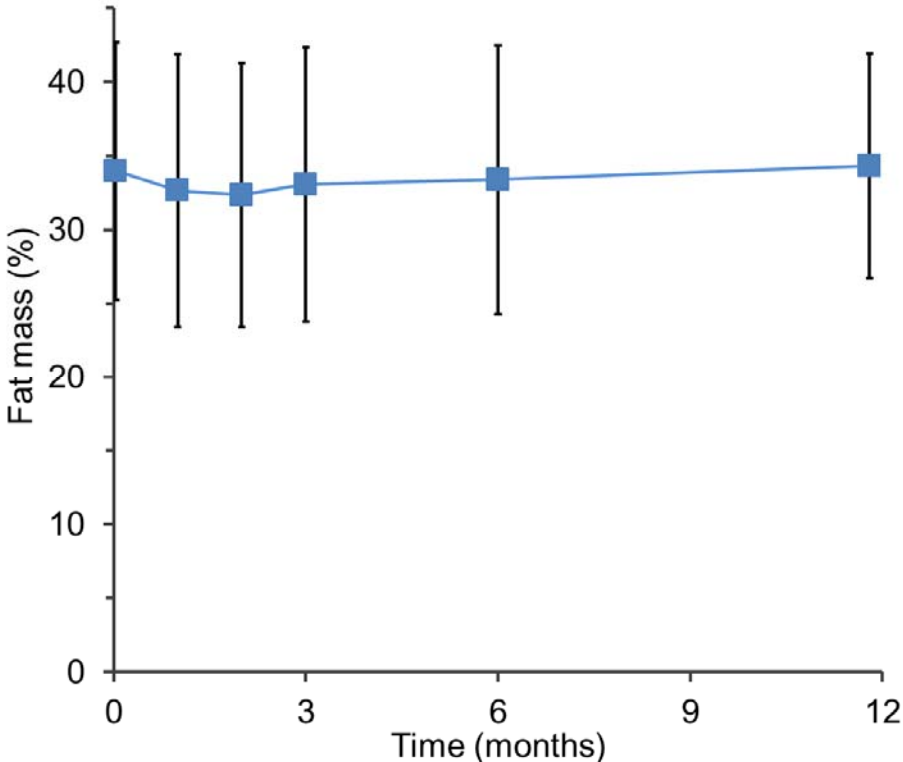

Supplementary Figure 1: Development of body fat mass (in %) among 37 cancer patients at baseline and following 1, 2, 3, 6 and 12 months of continuous physical exercise.

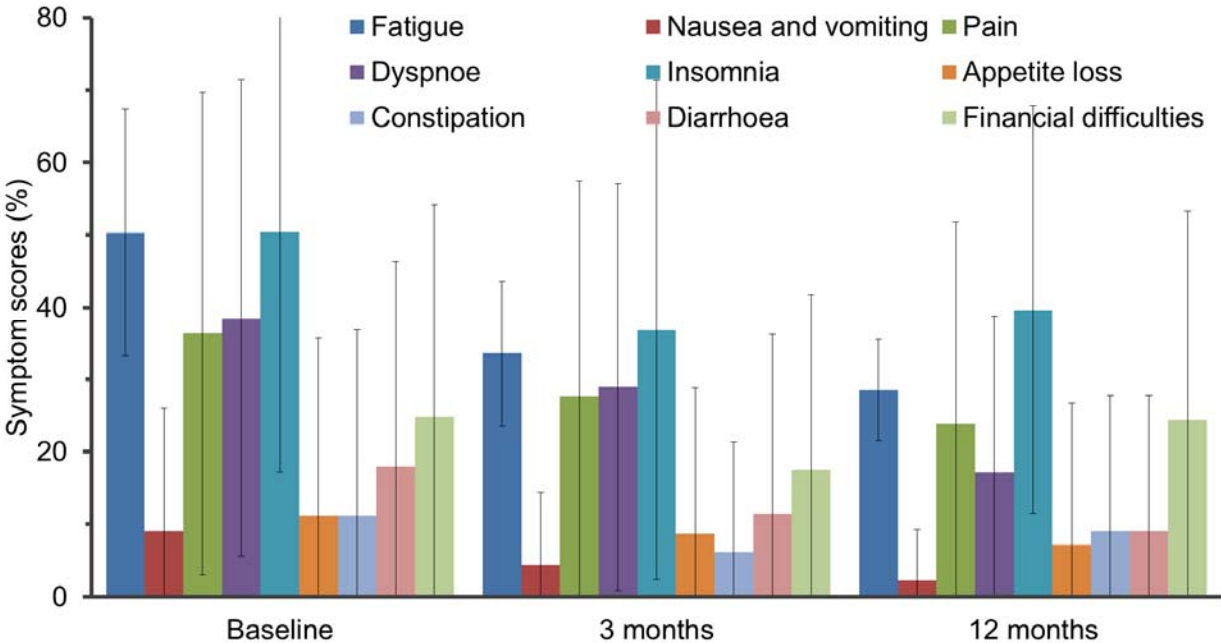

Supplementary Figure 2: Quality of life data on symptom scales for 37 cancer patients at baseline and at 3 and 12 months following continuous physical exercise

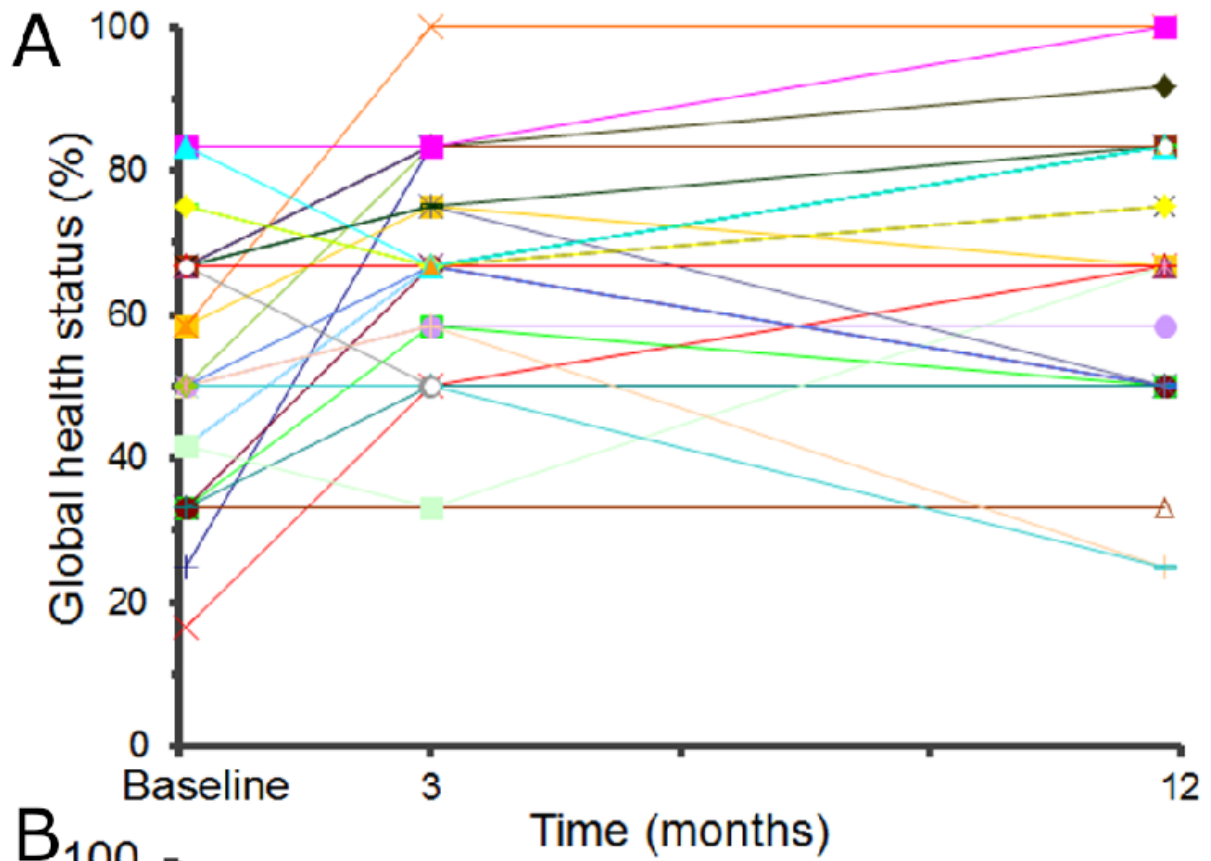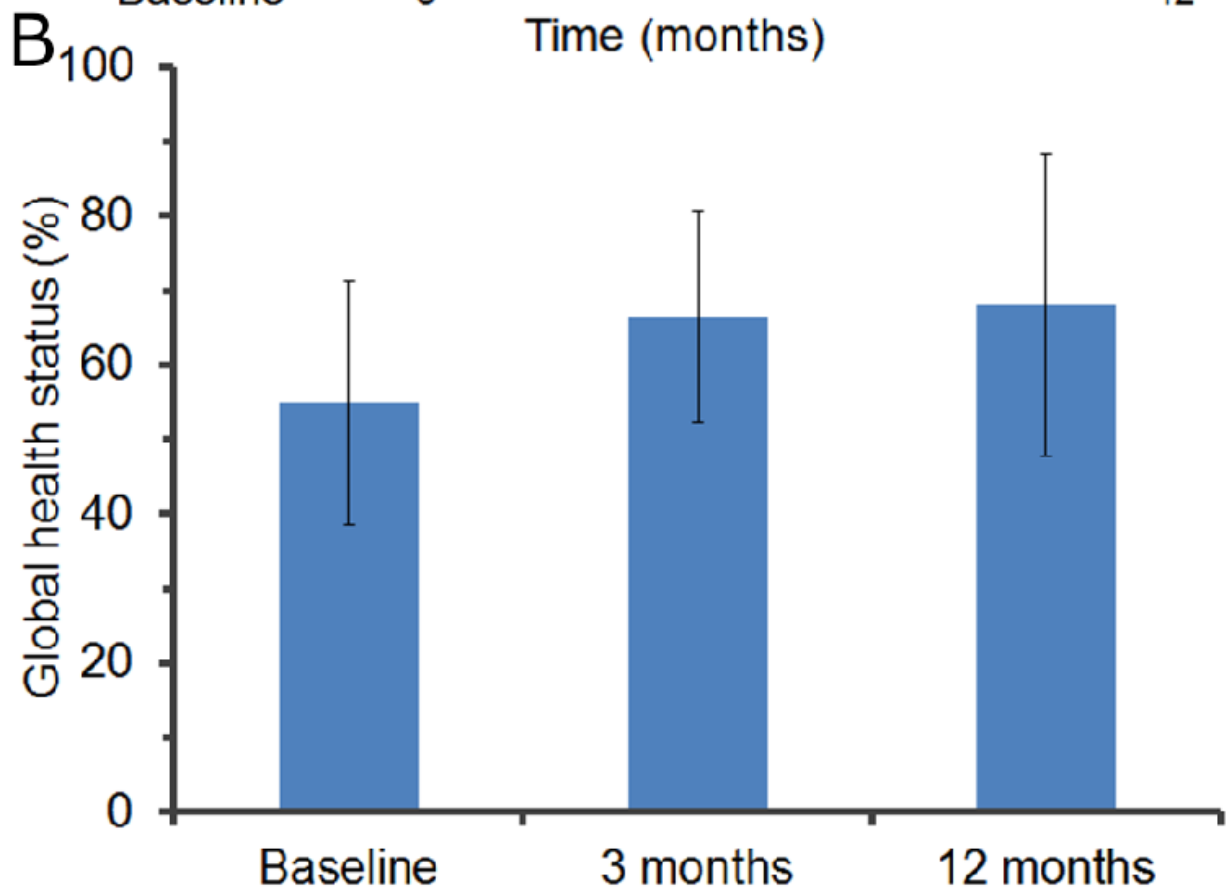

Supplementary Figure 3: Global health status in 37 cancer patients at baseline and at 3 and 12 months following continuous physical exercise. A) Individual values and B) mean values. Error bars represent standard deviation.

Supplementary table 1:

Data for body mass composition (median values  $\pm$ SD) among 39 cancer patients at baseline and at 1,2,3,6 and 12 months following physical exercise. FM, Fat mass; BCM, body cell mass; BMI, body mass index. RARF PA, phase angle.

|                              | Phase angle | FM %       | FM kg       | BCM kg     | BMI        |
|------------------------------|-------------|------------|-------------|------------|------------|
| <b>0 months</b><br>(n = 39)  | 5,39 (0,81) | 35,9 (8,8) | 30,7 (15,4) | 24,2 (4,0) | 28,9 (7,2) |
| <b>1 months</b><br>(n = 35)  | 5,33 (0,71) | 34,9 (9,0) | 29,2 (15,5) | 23,6 (3,6) | 28,1 (7,3) |
| <b>2 months</b><br>(n = 35)  | 5,36 (0,66) | 35,1 (8,7) | 29,4 (15,0) | 23,8 (3,5) | 28,2 (7,3) |
| <b>3 months</b><br>(n = 39)  | 5,26 (0,58) | 34,6 (9,0) | 28,9 (14,6) | 23,8 (3,5) | 28,2 (7,0) |
| <b>6 months</b><br>(n = 37)  | 5,26 (0,63) | 34,8 (8,7) | 29,2 (13,8) | 23,8 (3,0) | 28,5 (6,8) |
| <b>12 months</b><br>(n = 38) | 5,40 (0,75) | 35,3 (7,9) | 29,5 (13,3) | 24,0 (3,0) | 28,5 (6,7) |

Supplementary table 2:

Peak oxygen consumption ( $VO_{2max}$ ) among 36 cancer patients at baseline and after 3 and 12 months during continuous physical exercise (median values  $\pm$ SD).

|                              | $VO_{2max}$<br>ml/min<br>(SD) | $VO_{2max}$<br>ml/min per kg BW<br>(SD) |
|------------------------------|-------------------------------|-----------------------------------------|
| <b>Baseline</b><br>(n = 36)  | 1421.0 (387.6)                | 18.5 (5.6)                              |
| <b>3 months</b><br>(n = 36)  | 1537.6 (300.2)<br>(p = 0.006) | 20.4 (4.6)<br>(p = 0.005)               |
| <b>12 months</b><br>(n = 32) | 1520.1 (334.3)<br>(p = 0.017) | 20.0 (4.7)<br>(p = 0.003)               |

Supplementary table 3:

Functional scales among 39 cancer patients at baseline and after 3 and 12 months during continuous physical exercise (median values  $\pm$ SD).

|                              | <b>Physical functioning</b> | <b>Role functioning</b> | <b>Emotional functioning</b> | <b>Cognitive functioning</b> | <b>Social functioning</b> |
|------------------------------|-----------------------------|-------------------------|------------------------------|------------------------------|---------------------------|
| <b>0 months</b><br>(n = 39)  | 77,3 (18,3)                 | 55,6 (26,9)             | 52,4 (24,5)                  | 66,7 (27,3)                  | 58,1 (28,8)               |
| <b>3 months</b><br>(n = 38)  | 83,9 (18,5)                 | 73,7 (26,7)             | 63,4 (20,7)                  | 70,2 (30,5)                  | 72,4 (25,2)               |
| <b>12 months</b><br>(n = 37) | 84,7 (21,3)                 | 76,1 (30,3)             | 67,1 (23,8)                  | 76,1 (23,7)                  | 73,4 (27,3)               |

Supplementary table 4:

Symptom-scales among 39 cancer patients at baseline and after 3 and 12 months during continuous physical exercise (median values  $\pm$ SD).

|                              | <b>Fatigue</b> | <b>Nausea and vomiting</b> | <b>Pain</b> | <b>Dyspnoea</b> | <b>Insomnia</b> | <b>Appetite loss</b> | <b>Constipation</b> | <b>Diarrhoea</b> | <b>Financial difficulties</b> |
|------------------------------|----------------|----------------------------|-------------|-----------------|-----------------|----------------------|---------------------|------------------|-------------------------------|
| <b>0 months</b><br>(n = 39)  | 50,3 (27,4)    | 9,0 (17,0)                 | 36,3 (33,3) | 38,5 (32,9)     | 50,4 (33,2)     | 11,1 (24,6)          | 11,1 (25,7)         | 17,9 (28,5)      | 24,8 (29,3)                   |
| <b>3 months</b><br>(n = 38)  | 33,6 (24,7)    | 4,4 (10,0)                 | 27,6 (29,8) | 28,9 (28,1)     | 36,8 (34,5)     | 8,8 (20,0)           | 6,1 (15,2)          | 11,4 (24,8)      | 17,5 (24,2)                   |
| <b>12 months</b><br>(n = 37) | 28,5 (23,8)    | 2,3 (7,0)                  | 23,9 (27,9) | 17,1 (21,7)     | 39,6 (28,2)     | 7,2 (19,5)           | 9,0 (18,7)          | 9,0 (18,7)       | 24,3 (29,0)                   |

Supplementary Table 5: Subgroup analysis for the BMI difference at 3 months vs. baseline and 12 months vs. Baseline

| <b>BMI difference 3 months vs. Baseline</b>  |                    |                                 |                                         |         |
|----------------------------------------------|--------------------|---------------------------------|-----------------------------------------|---------|
| patient characteristic                       | number of patients | mean value in kg/m <sup>2</sup> | standard deviation in kg/m <sup>2</sup> | p value |
| ≤ 50 years                                   | 18                 | -1.31                           | 1.83                                    | 0.031   |
| > 50 years                                   | 21                 | -0.18                           | 1.31                                    |         |
| men                                          | 4                  | -0.27                           | 0.29                                    | 0.590   |
| women                                        | 35                 | -0.75                           | 1.73                                    |         |
| others                                       | 13                 | -0.97                           | 1.97                                    | 0.470   |
| breast cancer                                | 26                 | -0.56                           | 1.49                                    |         |
| curative                                     | 32                 | -0.72                           | 1.80                                    | 0.855   |
| palliative                                   | 7                  | -0.59                           | 0.71                                    |         |
| <b>BMI difference 12 months vs. Baseline</b> |                    |                                 |                                         |         |
| ≤ 50 years                                   | 18                 | -1.30                           | 2.40                                    | 0.054   |
| > 50 years                                   | 20                 | -0.01                           | 1.54                                    |         |
| men                                          | 4                  | -0.35                           | 1.19                                    | 0.787   |
| women                                        | 34                 | -0.65                           | 2.16                                    |         |
| others                                       | 12                 | -1.06                           | 2.14                                    | 0.375   |
| breast cancer                                | 26                 | -0.41                           | 2.05                                    |         |
| curative                                     | 32                 | -0.56                           | 2.15                                    | 0.702   |
| palliative                                   | 6                  | -0.92                           | 1.73                                    |         |

Supplementary Table 6: Subgroup analysis for the fat mass difference at 3 months vs. baseline and 12 months vs. baseline

| <b>FM difference 3 months vs. Baseline</b>  |                    |                  |                          |         |
|---------------------------------------------|--------------------|------------------|--------------------------|---------|
| patient characteristic                      | Number of patients | mean value in kg | standard deviation in kg | p value |
| ≤ 50 years                                  | 18                 | -2.9             | 3.5                      | 0.037   |
| > 50 years                                  | 21                 | -0.8             | 2.3                      |         |
| men                                         | 4                  | -0.6             | 1.9                      | 0.424   |
| women                                       | 35                 | -1.9             | 3.2                      |         |
| others                                      | 13                 | -2.6             | 3.5                      | 0.264   |
| breast cancer                               | 26                 | -1.4             | 2.8                      |         |
| curative                                    | 32                 | -1.8             | 3.3                      | 0.901   |
| palliative                                  | 7                  | -1.6             | 1.5                      |         |
| <b>FM difference 12 months vs. Baseline</b> |                    |                  |                          |         |
| ≤ 50 years                                  | 18                 | -3.0             | 5.0                      | 0.071   |
| > 50 years                                  | 20                 | -0.4             | 3.3                      |         |
| men                                         | 4                  | -0.2             | 3.1                      | 0.493   |
| women                                       | 34                 | -1.8             | 4.5                      |         |
| others                                      | 12                 | -2.7             | 4.2                      | 0.316   |
| breast cancer                               | 26                 | -1.1             | 4.4                      |         |
| curative                                    | 32                 | -1.5             | 4.5                      | 0.677   |
| palliative                                  | 6                  | -2.3             | 3.9                      |         |

Supplementary Table 7: Subgroup analysis for the difference of peak oxygen consumption at 3 months vs. baseline and 12 months vs. baseline

| <b>Difference of peak oxygen consumption at 3 months vs. Baseline</b>  |                    |                      |                              |         |
|------------------------------------------------------------------------|--------------------|----------------------|------------------------------|---------|
| patient characteristic                                                 | number of patients | mean value in ml/min | standard deviation in ml/min | p value |
| ≤ 50 years                                                             | 17                 | 121.1                | 305.9                        | 0.926   |
| > 50 years                                                             | 19                 | 112.6                | 235.5                        |         |
| men                                                                    | 4                  | -229.3               | 404.0                        | 0.004   |
| women                                                                  | 32                 | 159.8                | 217.6                        |         |
| others                                                                 | 11                 | 8.9                  | 344.1                        | 0.109   |
| breast cancer                                                          | 25                 | 164.0                | 216.8                        |         |
| curative                                                               | 30                 | 177.3                | 215.8                        | 0.001   |
| palliative                                                             | 6                  | -187.0               | 310.6                        |         |
| <b>Difference of peak oxygen consumption at 12 months vs. baseline</b> |                    |                      |                              |         |
| ≤ 50 years                                                             | 16                 | 84.9                 | 242.8                        | 0.507   |
| > 50 years                                                             | 16                 | 152.3                | 318.6                        |         |
| men                                                                    | 2                  | 184.5                | 385.4                        | 0.738   |
| women                                                                  | 30                 | 114.2                | 280.7                        |         |
| others                                                                 | 8                  | 51.9                 | 330.8                        | 0.447   |
| breast cancer                                                          | 24                 | 140.8                | 266.1                        |         |
| curative                                                               | 30                 | 130.4                | 277.2                        | 0.365   |
| palliative                                                             | 2                  | -58.5                | 384.0                        |         |

Supplementary Table 8: Subgroup analysis for the difference of the global health status at 3 months vs. baseline and 12 months vs. baseline

| <b>Difference of global health status after 3 months vs baseline</b>  |                    |                 |                         |         |
|-----------------------------------------------------------------------|--------------------|-----------------|-------------------------|---------|
| patient characteristic                                                | number of patients | mean value in % | standard deviation in % | p value |
| ≤ 50 years                                                            | 15                 | 10.6            | 17.7                    | 0.833   |
| > 50 years                                                            | 21                 | 11.9            | 19.5                    |         |
| Men                                                                   | 4                  | -4.2            | 10.8                    | 0.075   |
| Women                                                                 | 32                 | 13.3            | 18.4                    |         |
| Others                                                                | 12                 | 0.7             | 16.5                    | 0.012   |
| breast cancer                                                         | 24                 | 16.7            | 17.4                    |         |
| Curative                                                              | 30                 | 12.5            | 18.0                    | 0.409   |
| Palliative                                                            | 6                  | 5.6             | 21.5                    |         |
| <b>Difference of global health status after 12 months vs baseline</b> |                    |                 |                         |         |
| ≤ 50 years                                                            | 15                 | 15.6            | 24.0                    | 0.561   |
| > 50 years                                                            | 20                 | 10.8            | 23.3                    |         |
| men                                                                   | 3                  | 2.8             | 4.8                     | 0.442   |
| women                                                                 | 32                 | 13.8            | 24.2                    |         |
| others                                                                | 10                 | -1.7            | 25.4                    | 0.017   |
| breast cancer                                                         | 25                 | 18.7            | 20.2                    |         |
| curative                                                              | 31                 | 15.1            | 20.8                    | 0.123   |
| palliative                                                            | 4                  | -4.2            | 37.6                    |         |
